# Supplementary material
Source: publisher site journal article supplement (https://www.dovepress.com/get_supplementary_file.php?f=324043.docx)
Supplement: Supplementary file 1 [file get_supplementary_file.php]

**Table S1** Primers used in construction of recombinant strains and RT-PCR

| Primer name | | Sequence (5’-3’) |
| --- | --- | --- |
| Construction of recombinant strains | | |
| Left arm of *Rv1453* | LFP | TTTTTTTT*CCATAAATTGG*CGCATTGAGGGCATTGAGC |
| LRP | TTTTTTTT*CCATTTCTTGG*GCAGCGATGGATGGGTTGG |
| Right arm of *Rv1453* | RFP | TTTTTTTT*CCATAGATTGG*GCAACACCTTGATGAACCGAC |
| RRP | TTTTTTTT*CCATCTTTTGG*TGACACAATGGGCCACTC |
| pMV361+Rv1453 | FP | CGG*AAGCTT*GGGTGCACATTTGCCCTACTAT |
| RP | CGC*ATCGAT*CTCTTGCTAACGCATCTTGGTG |
| RT-PCR | | |
| *sigA* | FP | CGGCTACGCTTCGGCCTTAC |
| RP | GGCGCAACTTCGACATAGTCTTG |
| *Rv1453* | FP | TCCAATCGGGCGCATCTCAT |
| RP | ACATCCAGTAATTCGTGCAACTCGTC |
| *Rv1455* | FP | GCCAATCTGCTGAACTCGC |
| RP | GGAAGACCAACACGGTCTCG |
| *qor* | FP | GACCAGCCGCAACCTCAACC |
| RP | CTCCACCGTGCCGCATACCT |

Restriction endonuclease site is underlined in italics.

**Table S2** Primers used in EMSA and protein expression

| EMSA | | |
| --- | --- | --- |
| Qor | FP | GCGAACCGGGCACTACAG |
| RP | AATAGTCCACGCGGATCTGG |
| Rv1455 | FP | GACCTTGGCGGTCAGAGATG |
| RP | CATGATAGCCACATGCACGC |
| Qor-1-biotin | FP | CAGGTCACGTAGGTAACGGCGCTCG-biotin |
| RP | CGAGCGCCGTTACCTACGTGACCTG |
| Qor-2-biotin | FP | GGGTAGTCCAGGCCAAAAACTCGTC-biotin |
| RP | GACGAGTTTTTGGCCTGGACTACCC |
| Rv1455-biotin | FP | GCGGATATTGCCCGGAGCGGAAGTAGGTGTCGATGAAG-biotin |
| RP | CTTCATCGACACCTACTTCCGCTCCGGGCAATATCCGC-biotin |
| Protein expression | | |
| Rv1453 | FP | TTA*CATATG*GTGGCATTGCGGGAAAC |
| RP | CAC*AAGCTT*ACGCATCTTGGTGCCAT |

Restriction endonuclease site is underlined in italics.

A


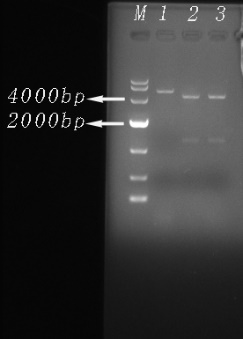


M：DL10000bp DNA Marker，lane1：Electrophoresis results of plasmid digestion with *HindIII* enzyme，lane2、3：Electrophoresis results of plasmid digestion with *HindIII* and *ClaI* enzymes.

B


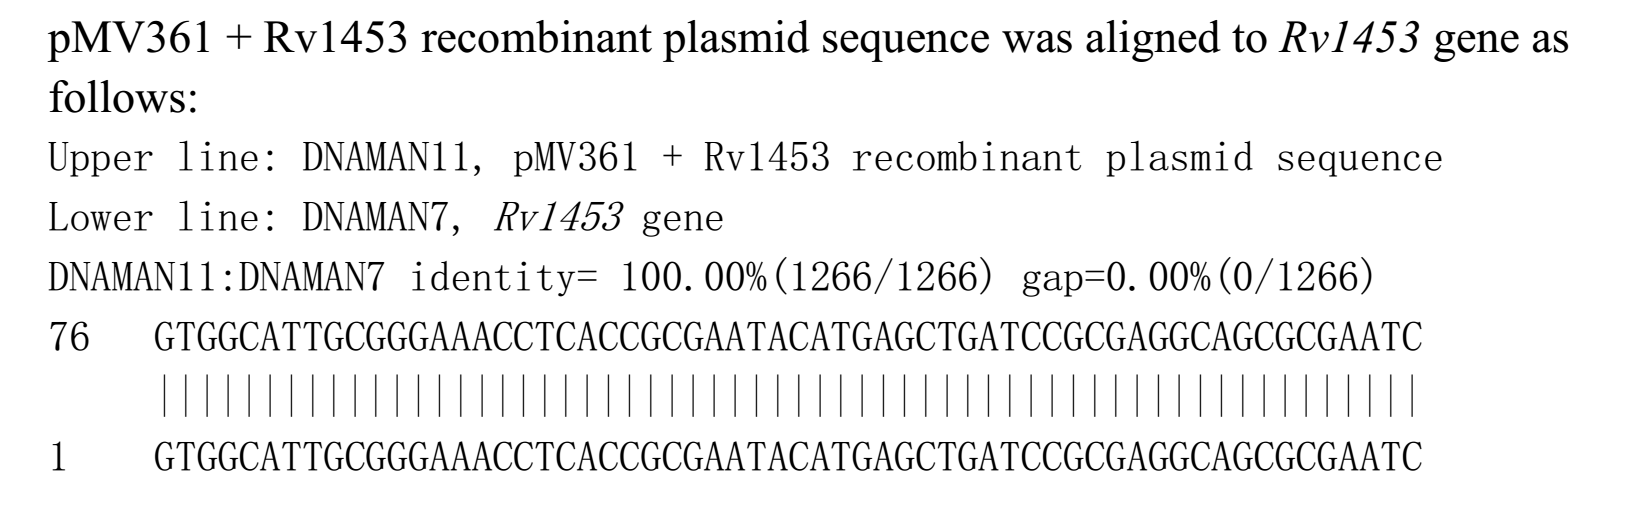


C


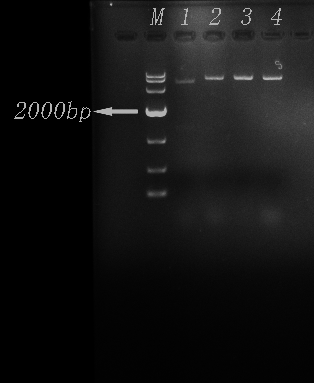


M：DL10000bp DNA Marker，lane1：Electrophoresis results of plasmid digestion with *HindIII* and *NdeI* enzymes，lane2-4：Electrophoresis results of plasmid digestion with *HindIII* enzyme.

D


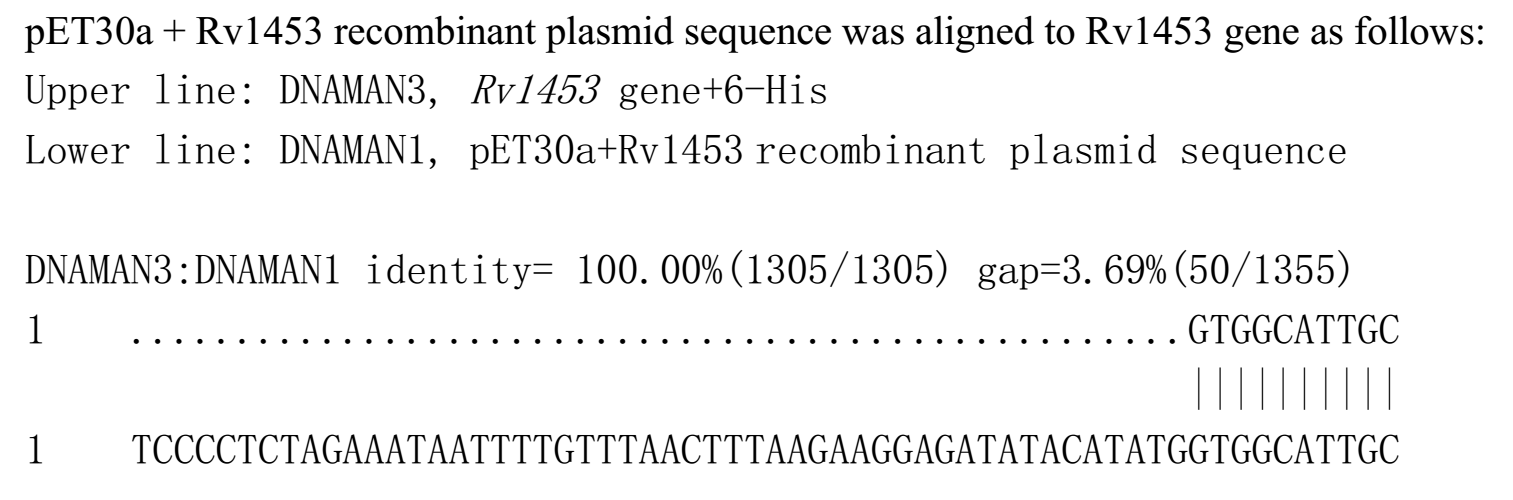


**Figure S1** Validation of the recombinant plasmid pMV361 +Rv1453 and pET30a+Rv1453. (A) Electrophoretogram of recombinant pMV361 +Rv1453 after digestion. (B) Sequence alignment results of recombinant plasmid pMV361 +Rv1453. (C) Electrophoretogram of recombinant pET30a+Rv1453 after digestion. (D) Sequence alignment results of recombinant plasmid pMV361 +Rv1453.
